# Supplementary material for: Design of triphasic poly(lactic-co-glycolic acid) nanoparticles containing a perfluorocarbon phase for biomedical applications
Source: Royal Society of Chemistry journal article supplement (doi:10.1039/c7ra13062g), 2018-01-01
Supplement: c7ra13062g1.pdf [file c7ra13062g1.pdf]

## Design of Triphasic Poly(lactic-co-glycolic acid) Nanoparticles Containing a Perfluorocarbon Phase for Biomedical Applications

Edyta Swider,<sup>1</sup> Alexander H. J. Staal,<sup>1</sup> N. Koen van Riessen,<sup>1</sup> Linsey Jacobs,<sup>1</sup> Paul B. White,<sup>2</sup> Remco Fokkink,<sup>3</sup> Geert-Jan Janssen,<sup>5</sup> Eric van Dinther,<sup>1</sup> Carl G. Figdor,<sup>1</sup> I. Jolanda M. de Vries,<sup>1,4</sup> Olga Koshkina,<sup>1‡</sup> Mangala Srinivas<sup>1‡\*</sup>

<sup>1</sup>Department of Tumor Immunology, Radboud Institute for Molecular Life Sciences, 6500 HB, Nijmegen, Netherlands

<sup>2</sup>Bio-Organic Chemistry, Radboud University, 6525 AJ, Nijmegen, Netherlands

<sup>3</sup>Department of Agrotechnology and Food Sciences, Physical Chemistry and Soft Matter, Wageningen University, 6708 WE, Wageningen, Netherlands

<sup>4</sup>Department of Medical Oncology, Radboud University Medical Center, 6500 HB, Nijmegen, Netherlands

<sup>5</sup>General Instrumentation, Radboud University, 6525 AJ Nijmegen, Netherlands

‡ Both authors contributed equally

\*Corresponding author: [mangala.srinivas@radboudumc.nl](mailto:mangala.srinivas@radboudumc.nl)

**Supporting Information**

## Effect of different parameters of synthesis

### Impact of surfactant

Table S1. Types of surfactant used during the synthesis of nanoparticles and the characteristics of obtained particles.

| Surfactant type                              | $R_h^2$ (nm) $\pm$ SD <sup>3</sup> | PDI <sup>4</sup> | PFCE content (wt-%) |
|----------------------------------------------|------------------------------------|------------------|---------------------|
| Polyvinyl alcohol PVA (low MW <sup>1</sup> ) | 120 $\pm$ 10                       | 0.11             | 16-26               |
| PVA (high MW)                                | 160 $\pm$ 43                       | 0.22             | n/a                 |
| Tween 20                                     | 215 $\pm$ 86                       | 0.81             | n/a                 |
| Sodium cholate                               | 390 $\pm$ 75                       | 0.85             | 6                   |
| Polyvinylpyrrolidone (PVP)                   | 450 $\pm$ 268                      | 0.77             | 3                   |
| Pluronic F68                                 | 315 $\pm$ 92                       | 0.45             | n/a                 |

<sup>1</sup>MW=molecular weight, <sup>2</sup> $R_h$ =hydrodynamic radius, <sup>3</sup>SD=standard deviation, <sup>4</sup>PDI=polydispersity index

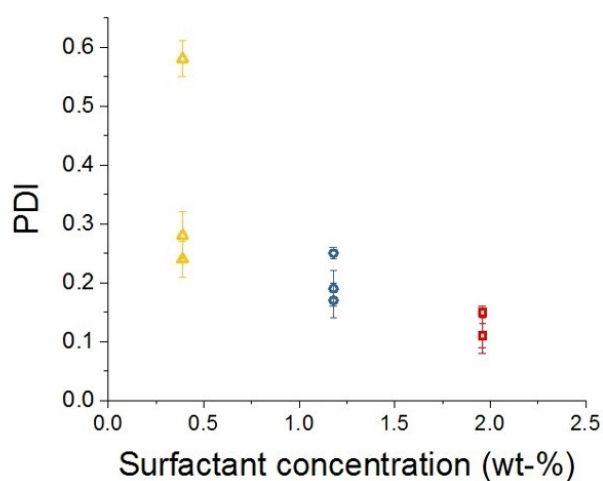

Fig. S1. Influence of PVA concentration on particle PDI. Particles were prepared using following surfactant concentrations: 2 wt.-%, 1.2 wt.-% and 0.4 wt.-%. Higher surfactant concentration resulted in nanoparticles with lower PDI. Error bars are based on standard deviation.

### Variation of solvent

Table S2. Types of solvents used during the synthesis of nanoparticles and the characteristics of obtained particles.

| Solvent         | Water miscibility | R (nm) $\pm$ SD <sup>1</sup> (based on TEM) | $R_h^2$ (nm) $\pm$ SD (based on DLS) | PDI <sup>3</sup> | PFCE content (wt-%) |
|-----------------|-------------------|---------------------------------------------|--------------------------------------|------------------|---------------------|
| Dichloromethane | Immiscible        | 85 $\pm$ 37                                 | 120 $\pm$ 10                         | 0.11             | 16-26               |
| Ethyl Acetate   | Immiscible        | 75 $\pm$ 25                                 | 135 $\pm$ 15                         | 0.12             | 27-53               |
| Chloroform      | Immiscible        | 76 $\pm$ 36                                 | 145 $\pm$ 15                         | 0.13             | 24-29               |
| Acetone         | Miscible          | 155 $\pm$ 170                               | 300 $\pm$ 101                        | 0.44             | 7-9                 |

|                                 |                      |                    |                    |              |            |
|---------------------------------|----------------------|--------------------|--------------------|--------------|------------|
| Tetrahydrofuran<br>Acetonitrile | Miscible<br>Miscible | 125 ±103<br>85 ±32 | 195 ±55<br>235 ±45 | 0.33<br>0.35 | 4-7<br>2-4 |
|---------------------------------|----------------------|--------------------|--------------------|--------------|------------|

<sup>1</sup>SD=standard deviation, <sup>2</sup>R<sub>h</sub>=hydrodynamic radius, <sup>3</sup>PDI=polydispersity index

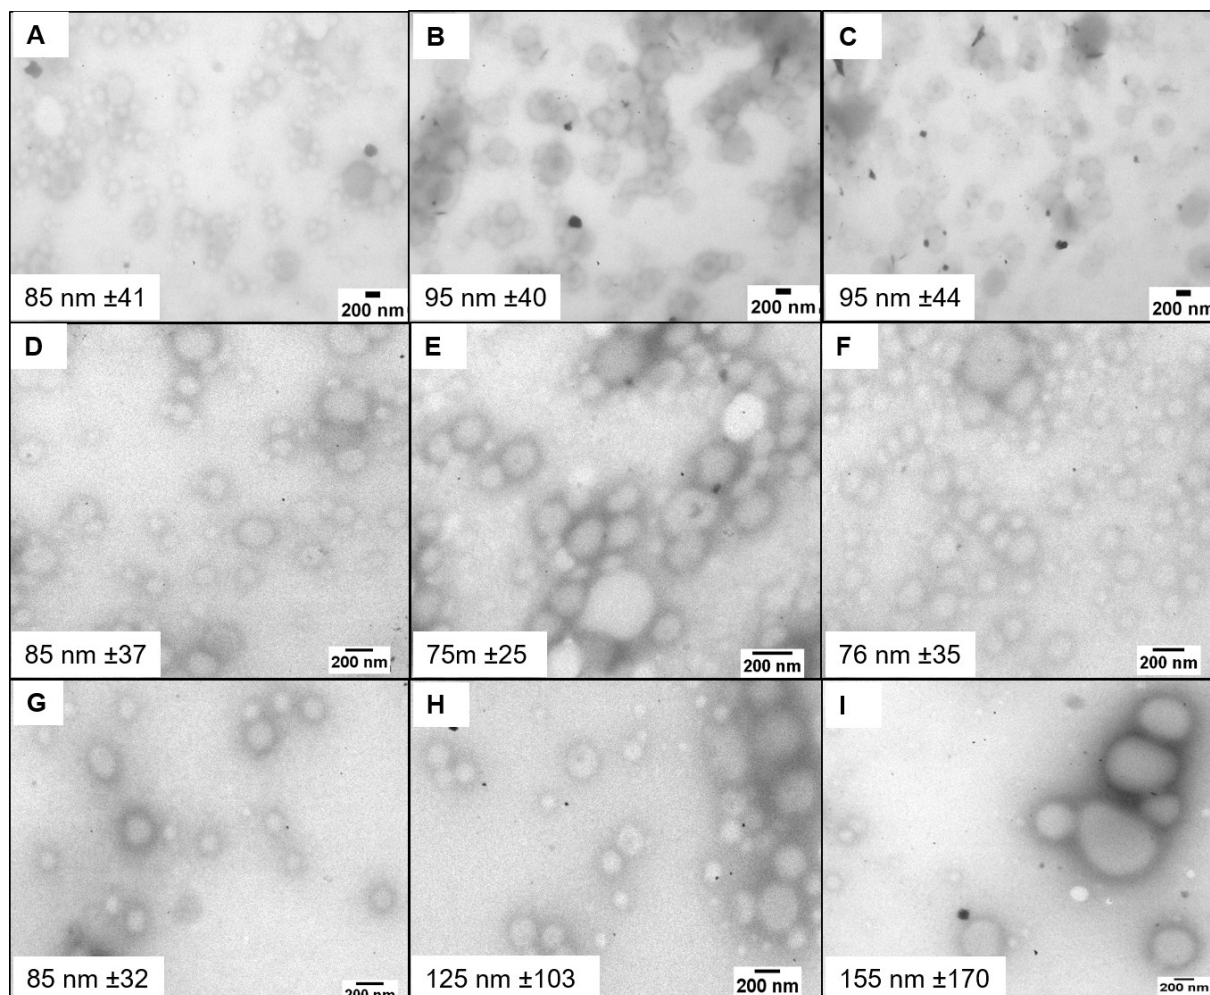

Fig. S2. TEM images of particles formulated with different PLGA concentration: (A) 1.75 wt.-%, (B) 2.6 wt.-%, (C) 3.45 wt.-%; and various solvents: (D) PLGA-DCM, (E) PLGA-AcOEt, (F) PLGA-Chloroform, (G) PLGA-Acetone, (H) PLGA-THF, (I) PLGA-MeCN particles. Indicated size and standard deviation were calculated after measurement of an average of 100 particles

Table S3. Characteristics of nanoparticles prepared with combination of different polarity solvent.

| Nanoparticles<br>(solvent type) | R <sub>h</sub> ±SD (based on DLS at<br>173°) | Polydispersity<br>Index | PFCE encapsulation (wt.-%) |
|---------------------------------|----------------------------------------------|-------------------------|----------------------------|
| DCM                             | 93-103 ±5                                    | 0.05-0.12               | 20-22                      |
| DCM+MeCN                        | 85-99 ±2                                     | 0.06-0.15               | 17-19                      |
| DCM+toluene                     | 117-196 ±32                                  | 0.16-0.28               | 11-19                      |

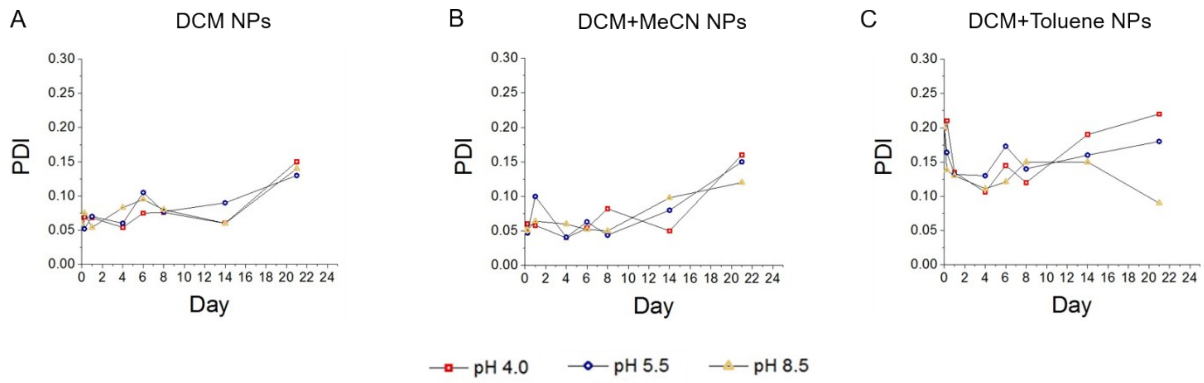

Fig. S3. DLS analysis of incubated samples, showed gradual increase in particles PDI (A-C). Lines indicate trend of the data.

### Dye encapsulation

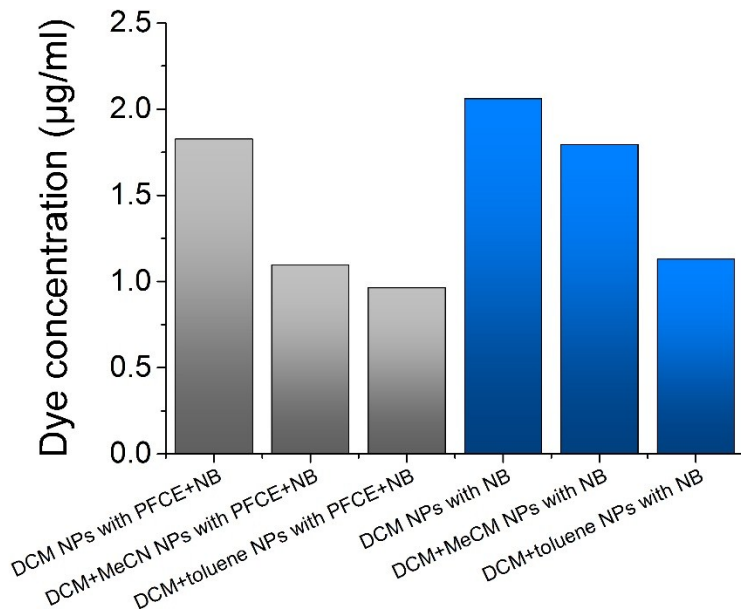

Fig. S4. Comparison of Nile blue encapsulation in PLGA nanoparticles with or without PFCE. Nanoparticles synthesized with combination of different solvents (LIST HERE; WHICH). The particles were synthesized either with or without PFCE.

### Cellular Uptake

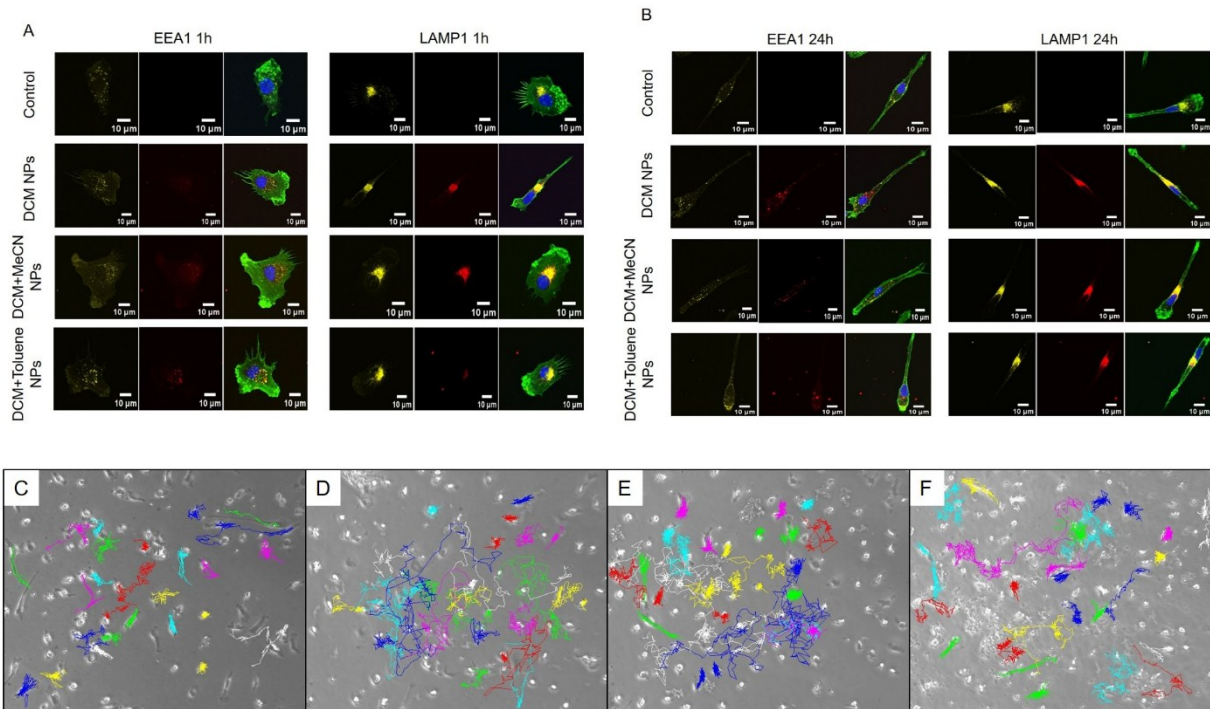

Fig. S5. (A-B) Images of confocal microscopy showing the uptake of particles by human monocyte-derived DCs after 1 hour (A) and 24 hours (B) of incubation. Fluorescent signal coming from the particles partially overlaps with the EEA1 signal. Higher colocalization of particles was observed with the LAMP1 signal. (C-F) Images show the trajectory of migrating cells which were either non-labeled (C) or labeled with DCM particles (D), DCM+MeCN particles (E) or DCM+Toluene particles (F). Cell migration was measured over the course of 24 hours.
